# Supplementary material
Source: publisher figshare collection journal article supplement (https://acs.figshare.com/ndownloader/files/5794545)
Supplement: Supplementary file 1 [file 5794545]

#### Terms & Conditions

Electronic Supporting Information files are available without a subscription to ACS Web Editions. The American Chemical Society holds a copyright ownership interest in any copyrightable Supporting Information. Files available from the ACS website may be downloaded for personal use only. Users are not otherwise permitted to reproduce, republish, redistribute, or sell any Supporting Information from the ACS website, either in whole or in part, in either machine-readable form or any other form without permission from the American Chemical Society. For permission to reproduce, republish and redistribute this material, requesters must process their own requests via the RightsLink permission system. Information about how to use the RightsLink permission system can be found at <http://pubs.acs.org/page/copyright/permissions.html>

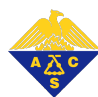

**ACS Publications**  
MOST TRUSTED. MOST CITED. MOST READ.

## Supporting Information.

### Oripavine (1).

**Method A;** A mixture of thebaine (2) (3.64 g, 11.7 mmol) and L-Selectride (1M in THF, 60 mL) was stirred at room temperature for 14 days under an atmosphere of argon. The reaction was quenched with water (50 mL) followed by aqueous NaOH solution (15%, 30 mL) and the THF removed under reduced pressure. The resulting mixture was washed with dichloromethane (2 X 50 mL), cooled to 0-5 °C and acidified (pH 1) with hydrochloric acid (10%). After basification with ammonia solution (pH 9), the mixture was extracted into chloroform (3 X 60 mL) and the organic phase washed with brine (100 mL) and dried (Na<sub>2</sub>SO<sub>4</sub>). Removal of the solvent under reduced pressure gave crude oripavine. Crystallization as the oxalate salt from methanol gave oripavine oxalate (1.69 g, 35%) (CHN, 1.5 H<sub>2</sub>O). The original dichloromethane extracts were washed with water (2 X 100 mL), followed by brief treatment with basic hydrogen peroxide (50 mL, 0.5%) . The organic layer was separated, washed with brine (100 mL) and dried (Na<sub>2</sub>SO<sub>4</sub>). Removal of the solvent under reduced pressure gave a brown foam. Crystallization as the (+)-tartaric acid salt from methanol gave thebaine tartrate (270 mg, 5%).

**Method B;** As method A but treatment with 2 equivalents of L-Selectride at reflux for 30 mins to give oripavine oxalate hydrate (23%) and thebaine tartrate (31%).

mp. (oxalate) 198-200°C (dec.); <sup>1</sup>H NMR (300MHz, CDCl<sub>3</sub>) δ 2.45 (s, 3H, NCH<sub>3</sub>), 3.31 (d, 1H, *J* = 18.5, 10β-H), 3.59 (s, 3H, 6-OCH<sub>3</sub>), 5.04 (d, 1H, *J* = 6.2, 8-H), 5.28 (s, 1H, 5-H), 5.55 (d, 1H, *J* = 6.2, 7-H), 6.54 (d, 1H, *J* = 8.2, 1-H), 6.62 (d, 1H, *J* = 8.2, 2-H); m/z (CI) 298 (M+1, 100%); Anal. calcd for C<sub>20</sub>H<sub>21</sub>NO<sub>7</sub>·1.5 H<sub>2</sub>O: C, 57.96; H, 5.84; N, 3.38. Found C, 58.22; H, 5.82; N, 3.41.

### Orvinone (4).

A solution of oripavine (1) (1.26 g, 4.24 mmol) and 1-buten-3-one (10 mL) in toluene (10 mL) was heated at reflux for 2.5 h. After cooling, the solvents were removed under reduced pressure. Crystallization from methanol gave orvinone (4) (1.28 g, 82%).

mp. 202-3°C;  $^1\text{H}$  NMR (300MHz,  $\text{CDCl}_3$ )  $\delta$  2.12 (s, 3H, 21-H), 2.37 (s, 3H,  $\text{NCH}_3$ ), 3.21 (d, 1H,  $J = 18.5$ , 10 $\beta$ -H), 3.57 (s, 3H, 6- $\text{OCH}_3$ ), 4.60 (d, 1H,  $J = 1.1$ , 5-H), 5.56 (d, 1H,  $J = 8.7$ , 19-H), 5.88 (d, 1H,  $J = 8.6$ , 18-H), 6.49 (d, 1H,  $J = 8.1$ , 1-H), 6.62 (d, 1H,  $J = 8.1$ , 2-H);  $m/z$  (CI) 368 ( $\text{M}+1$ , 100%); Anal. calcd for  $\text{C}_{22}\text{H}_{25}\text{NO}_4$ : C, 71.91; H, 6.86; N, 3.81. Found C, 71.64; H, 6.92; N, 3.73.
